# Supplementary material
Source: PubMed Central journal article supplement (PMC9128670)

**Supplemental Table 1.** Demographic population characteristics of young Thai men.

| Demographic characteristics              | Number of subjects (%)* by year |            |
|------------------------------------------|---------------------------------|------------|
|                                          | 2007-2008                       | 2012       |
| Total                                    | 7760 (100)                      | 6627 (100) |
| <b>Age group (years)</b>                 |                                 |            |
| 18-20                                    | 1164 (15)                       | 245 (4)    |
| 21                                       | 5359 (70)                       | 5259 (79)  |
| 22-30                                    | 1150 (15)                       | 1113 (17)  |
| <b>Education level</b>                   |                                 |            |
| Primary school and less                  | 2121 (27)                       | 1347 (20)  |
| Middle school                            | 2641 (34)                       | 2514 (38)  |
| Senior high school and vocational        | 1920 (25)                       | 1805 (27)  |
| Diploma: vocational or Bachelor's degree | 1061 (14)                       | 961 (15)   |
| <b>Marital status</b>                    |                                 |            |
| Single                                   | 6067 (80)                       | 5291 (80)  |
| Married                                  | 1509 (20)                       | 1336 (20)  |
| <b>Residential area</b>                  |                                 |            |
| Urban                                    | 2503 (39)                       | 3023 (46)  |
| Rural                                    | 3896 (61)                       | 3604 (54)  |
| <b>Region of residence</b>               |                                 |            |
| Central                                  | 2626 (34)                       | 2098 (32)  |
| North                                    | 1738 (22)                       | 1151 (17)  |
| Northeast                                | 2004 (26)                       | 2329 (35)  |
| South                                    | 1392 (18)                       | 1049 (16)  |

\*Number in each demographic characteristic does not add to the total number of study subjects because of missing data.

**Supplemental Table 2.** Occupation and rickettsiae seroprevalence in young Thai men, 2012.

| Occupation                                | Study subjects<br>Number (%) | IgG seroprevalence, % (95% CI*) |                 |                          |
|-------------------------------------------|------------------------------|---------------------------------|-----------------|--------------------------|
|                                           |                              | Scrub typhus<br>group**         | Typhus group    | Spotted fever<br>group** |
| Farming, Fishing,<br>Herdsman             | 1499 (23)                    | 37.0 (34.5 - 39.4)              | 3.7 (2.8 - 4.7) | 5.3 (4.1 - 6.4)          |
| Labor, General hire                       | 1247 (19)                    | 32.6 (30.0 - 35.2)              | 4.0 (2.9 - 5.1) | 4.2 (3.1 - 5.3)          |
| Trades, Technician                        | 662 (10)                     | 30.8 (27.3 - 34.3)              | 5.3 (3.6 - 7.0) | 3.3 (2.0 - 4.7)          |
| Student                                   | 1020 (16)                    | 29.3 (26.5 - 32.1)              | 4.1 (2.9 - 5.3) | 3.2 (2.1 - 4.3)          |
| Business, Company,<br>Government employee | 1987 (31)                    | 29.8 (27.8 - 31.9)              | 4.4 (3.5 - 5.3) | 5.3 (4.3 - 6.3)          |

\*CI=Confidence interval

\*\*  $\chi^2$  test statistically significant (Pearson's chi square, two-sided,  $p < 0.05$ ).

**Supplemental Figure 1.** Scrub Typhus incidence\* and scrub typhus group seroprevalence, Thailand 2007-2012.

\*Scrub Typhus incidence data from Bureau of Epidemiology, Ministry of Public Health, Thailand.<sup>9</sup>

**Supplemental Figure 2.** Percentage of land use data\* in each region, Thailand.

\*Land use data were collected by the Office of Agricultural Economics, the Ministry of Agriculture and Cooperatives, Thailand and reported by the National Statistical Office in the Ministry of Digital Economy and Society of Thailand. The land data were assembled from geographic information system and field site surveys.<sup>17</sup>

## Scrub Typhus Incidence in Thailand, 2007-2012

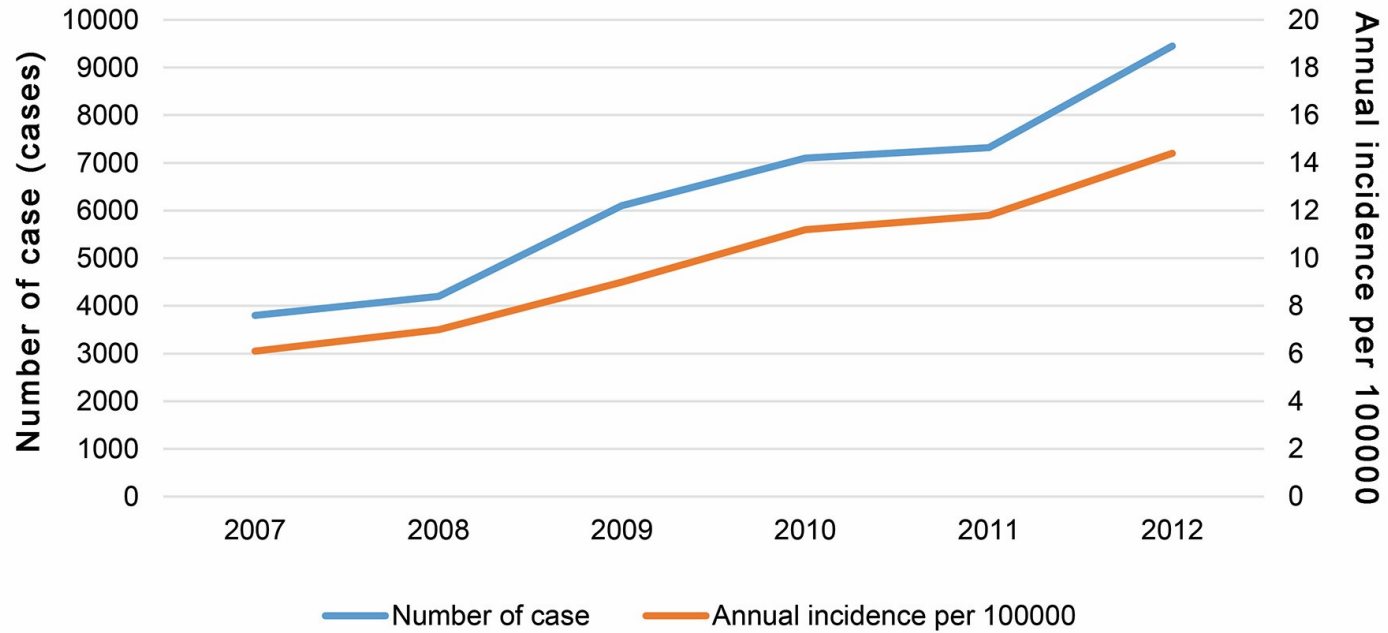

## Scrub Typhus Group IgG Seroprevalence in Young Thai Men

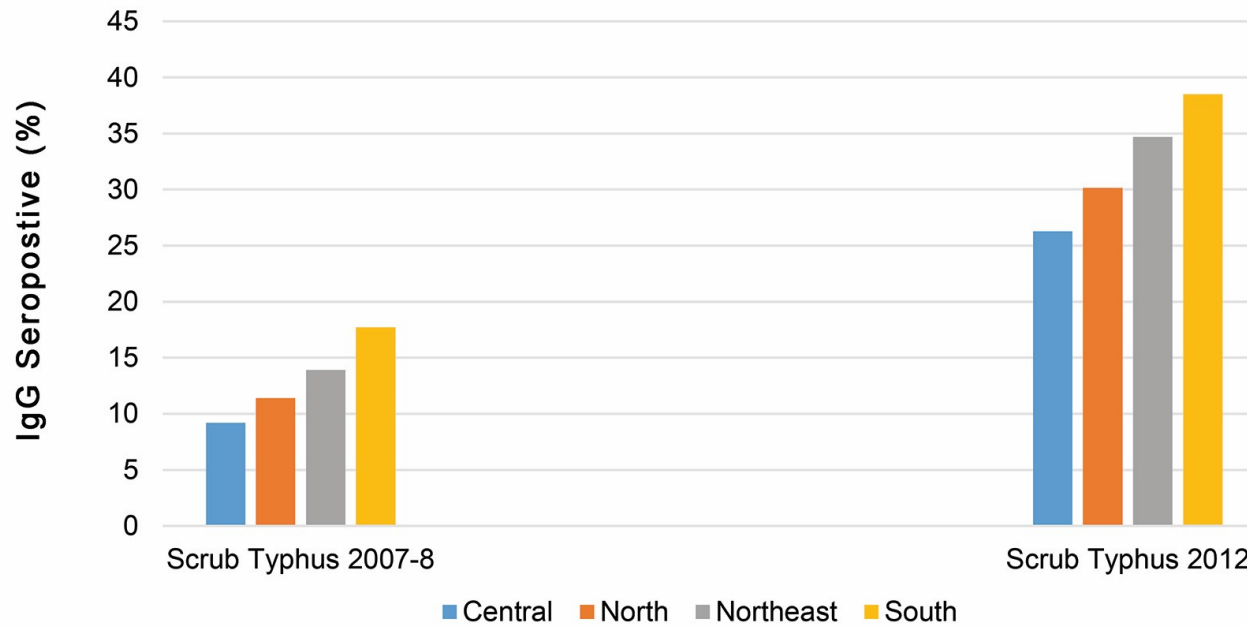

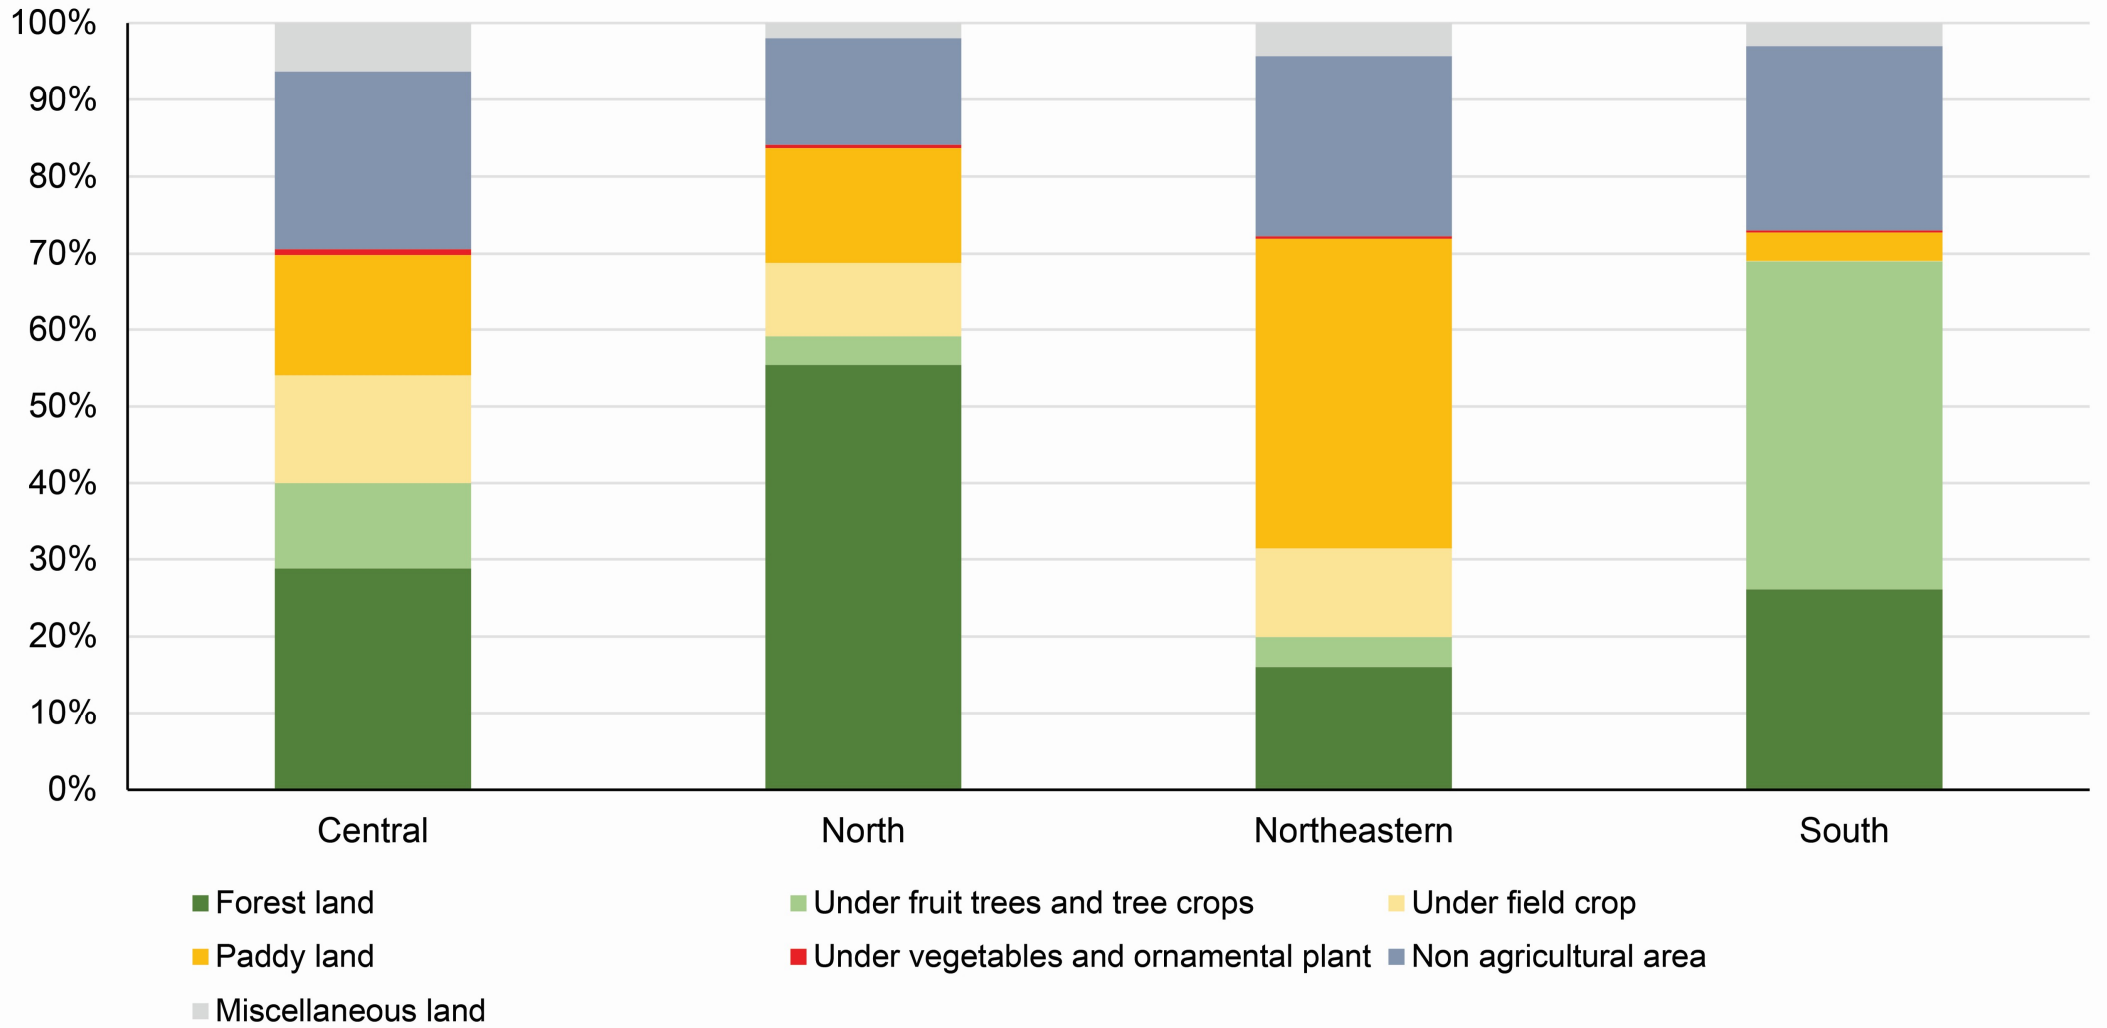

Supplement: tpmd201512.SD1.pdf [file tpmd201512.SD1.pdf]
